# Supplementary material for: A Tandem Oligonucleotide Approach for SNP-Selective RNA Degradation Using Modified Antisense Oligonucleotides
Source: PubMed Central journal article supplement (PMC4704561; doi:10.1371/journal.pone.0142139), 2015-11-06
Supplement: pone.0142139.s012.pdf [file pone.0142139.s012.pdf]

| Name | Length | 5'-3' sequence                                                                                                                                        |
|------|--------|-------------------------------------------------------------------------------------------------------------------------------------------------------|
| Ia1  | 7      | A <sup>M</sup> C <sup>M</sup> G <sup>M</sup> G <sup>L</sup> C <sup>M</sup> C <sup>M</sup> U <sup>M</sup>                                              |
| Ia2  | 10     | C <sup>M</sup> A <sup>M</sup> C <sup>M</sup> G <sup>M</sup> G <sup>L</sup> C <sup>M</sup> C <sup>M</sup> U <sup>M</sup> U <sup>M</sup> C <sup>M</sup> |
| aKM  | 13     | C <sup>L</sup> A <sup>M</sup> C <sup>L</sup> <b>acgacct</b> U <sup>L</sup> C <sup>M</sup> G <sup>L</sup>                                              |
| Ib1  | 7      | U <sup>M</sup> C <sup>M</sup> U <sup>M</sup> G <sup>L</sup> C <sup>M</sup> A <sup>M</sup> A <sup>M</sup>                                              |
| Ib2  | 10     | C <sup>M</sup> U <sup>M</sup> U <sup>M</sup> C <sup>M</sup> U <sup>M</sup> G <sup>L</sup> C <sup>M</sup> A <sup>M</sup> A <sup>M</sup> A <sup>M</sup> |
| bKM  | 13     | C <sup>L</sup> A <sup>M</sup> U <sup>L</sup> <b>cttctcc</b> A <sup>L</sup> A <sup>M</sup> A <sup>L</sup>                                              |
| Id1  | 7      | U <sup>M</sup> G <sup>M</sup> A <sup>M</sup> C <sup>L</sup> G <sup>M</sup> A <sup>M</sup> U <sup>M</sup>                                              |
| Id2  | 10     | G <sup>M</sup> A <sup>M</sup> U <sup>M</sup> G <sup>M</sup> A <sup>M</sup> C <sup>L</sup> G <sup>M</sup> A <sup>M</sup> U <sup>M</sup> C <sup>M</sup> |
| dKM  | 13     | U <sup>L</sup> G <sup>M</sup> A <sup>L</sup> <b>tgatgat</b> C <sup>L</sup> A <sup>M</sup> C <sup>L</sup>                                              |
| Ie1  | 7      | U <sup>M</sup> C <sup>M</sup> U <sup>M</sup> U <sup>L</sup> C <sup>M</sup> U <sup>M</sup> G <sup>M</sup>                                              |
| Ie2  | 9      | C <sup>M</sup> A <sup>M</sup> U <sup>M</sup> C <sup>M</sup> U <sup>M</sup> U <sup>L</sup> C <sup>M</sup> U <sup>M</sup> G <sup>M</sup>                |
| eKM  | 13     | C <sup>L</sup> A <sup>M</sup> U <sup>L</sup> <b>ctcctgc</b> A <sup>L</sup> A <sup>M</sup> A <sup>L</sup>                                              |
| If1  | 7      | C <sup>M</sup> C <sup>M</sup> C <sup>M</sup> C <sup>L</sup> C <sup>M</sup> U <sup>M</sup> G <sup>M</sup>                                              |
| If2  | 10     | G <sup>M</sup> U <sup>M</sup> C <sup>M</sup> C <sup>M</sup> C <sup>L</sup> C <sup>M</sup> U <sup>M</sup> G <sup>M</sup> C <sup>M</sup>                |
| fKM  | 13     | U <sup>L</sup> A <sup>M</sup> G <sup>L</sup> <b>gtcccgc</b> U <sup>L</sup> G <sup>M</sup> C <sup>L</sup>                                              |
| Ih1  | 7      | U <sup>M</sup> U <sup>M</sup> G <sup>M</sup> C <sup>L</sup> C <sup>M</sup> A <sup>M</sup> C <sup>M</sup>                                              |
| Ih2  | 10     | U <sup>M</sup> G <sup>M</sup> U <sup>M</sup> U <sup>M</sup> G <sup>M</sup> C <sup>L</sup> C <sup>M</sup> A <sup>M</sup> C <sup>M</sup> A <sup>M</sup> |
| hKM  | 13     | C <sup>L</sup> U <sup>M</sup> G <sup>L</sup> <b>ttgtcac</b> A <sup>L</sup> C <sup>M</sup> C <sup>L</sup>                                              |
| Ik1  | 7      | C <sup>M</sup> C <sup>M</sup> U <sup>M</sup> C <sup>L</sup> C <sup>M</sup> U <sup>M</sup> U <sup>M</sup>                                              |
| Ik2  | 10     | C <sup>M</sup> C <sup>M</sup> C <sup>M</sup> U <sup>M</sup> C <sup>L</sup> C <sup>M</sup> U <sup>M</sup> U <sup>M</sup> G <sup>M</sup> G <sup>M</sup> |
| kKM  | 13     | C <sup>L</sup> U <sup>M</sup> C <sup>L</sup> <b>cettctt</b> G <sup>L</sup> G <sup>M</sup> U <sup>L</sup>                                              |
