# Supplementary material for: A Tandem Oligonucleotide Approach for SNP-Selective RNA Degradation Using Modified Antisense Oligonucleotides
Source: PubMed Central journal article supplement (PMC4704561; doi:10.1371/journal.pone.0142139), 2015-11-06
Supplement: pone.0142139.s013.pdf [file pone.0142139.s013.pdf]

| WT RNA/ASO duplexes<br>(5'-3')/(3'-5')    | -ΔG° <sub>37</sub> | Tm <sup>a</sup> | Mut RNA/ASO duplexes<br>(5'-3')/(3'-5') | -ΔG° <sub>37</sub> | Tm <sup>a</sup> | Inhibitor <sup>b,c</sup><br>influence<br>ΔΔG° <sub>37</sub> | WT-Mut<br>RNA<br>ΔΔG° <sub>37</sub> | Percentage hydrolysis of RNA <i>in vitro</i> <sup>d</sup> |                                                       |             | Expression of RNA in <i>HeLa</i> cells |         |                          |
|-------------------------------------------|--------------------|-----------------|-----------------------------------------|--------------------|-----------------|-------------------------------------------------------------|-------------------------------------|-----------------------------------------------------------|-------------------------------------------------------|-------------|----------------------------------------|---------|--------------------------|
| <i>Transversion C/G (C692G, APP gene)</i> |                    |                 |                                         |                    |                 |                                                             |                                     | WT RNA                                                    | Mut RNA                                               | Difference  | WT RNA                                 | Mut RNA | Selectivity              |
| UUUGCAGAAGAUG<br><b>AAACGUCU</b> Ib1      | 9.29±0.10          | 53.1            | UUUGGAGAAGAUG<br><b>AAACGUCU</b>        | 4.60±0.18          | 22.8            | 0 <sup>b</sup>                                              | 4.69                                | 87.4 ± 2.4 <sup>e</sup><br>(10.5 ± 4.5) <sup>f</sup>      | 98.6 ± 1.8 <sup>e</sup><br>(-4.60 ± 6.0) <sup>f</sup> | 11.2 ± 3.0  | 82%                                    | 36%     | 46% (25/50) <sup>j</sup> |
| UUUGCAGAAGAUG<br><b>AAACGUCUUC</b> Ib2    | 12.60±0.07         | 66.9            | UUUGGAGAAGAUG<br><b>AAACGUCUUC</b>      | 8.64±0.03          | 46.4            | (0) <sup>c</sup>                                            | 3.96                                | 11.7 ± 2.5 <sup>e</sup><br>(86.2 ± 4.5) <sup>h</sup>      | 98.8 ± 4.9 <sup>e</sup><br>(-4.80 ± 7.5) <sup>h</sup> | 87.1 ± 5.50 | 67%                                    | 28%     | 39%<br>(25/50)           |
| UUUGCAGAAGAUG<br><b>AAACCTCTTCUAC</b> bKM | 9.81±0.08          | 48.6            | UUUGGAGAAGAUG<br><b>AAACCTCTTCUAC</b>   | 17.92±0.59         | 67.2            | 8.63 <sup>b</sup><br>(5.32) <sup>c</sup>                    | -8.11                               | 97.9 ± 3.8 <sup>i</sup><br>(0.0)                          | 94.0 ± 5.7 <sup>i</sup><br>(0.0)                      | -3.9 ± 6.85 | 49%                                    | 52%     | 3%<br>(50) <sup>k</sup>  |
| <i>Transition G/A (G717A, APP gene)</i>   |                    |                 |                                         |                    |                 |                                                             |                                     |                                                           |                                                       |             |                                        |         |                          |
| GUGAUCGUCAUCA<br><b>UAGCAGU</b> Id1       | 9.31±0.03          | 56.1            | GUGAUCUCAUCA<br><b>UAGCAGU</b>          | 7.71±0.04          | 44.4            | 0                                                           | 1.60                                | 30.3 ± 7.7<br>(27.4 ± 17.6)                               | 67.3 ± 2.9<br>(16.3 ± 13.0)                           | 37.0 ± 8.2  | -                                      | -       | -                        |
| GUGAUCGUCAUCA<br><b>CUAGCAGUAG</b> Id2    | 15.01±0.15         | 72.9            | GUGAUCUCAUCA<br><b>CUAGCAGUAG</b>       | 10.36±0.10         | 53.5            | (0)                                                         | 4.65                                | 10.7 ± 3.2<br>(47.7 ± 16.8/)                              | 72.4 ± 3.8<br>(11.2 ± 13.1)                           | 61.7 ± 5.0  | -                                      | -       | -                        |
| GUGAUCGUCAUCA<br><b>CACTAGTAGTAGU</b> dKM | 10.48±0.05         | 57.3            | GUGAUCUCAUCA<br><b>CACTAGTAGTAGU</b>    | 10.98±0.09         | 61.3            | 1.67<br>(-4.03)                                             | -0.50                               | 57.7 ± 15.8<br>(0.0)                                      | 83.6 ± 12.6<br>(0.0)                                  | 25.9 ± 20.8 | 123%                                   | 31%     | 92%<br>(50)              |
| <i>Transition A/G (A693G, APP)</i>        |                    |                 |                                         |                    |                 |                                                             |                                     |                                                           |                                                       |             |                                        |         |                          |
| UUUGCAGAAGAUG<br><b>GUCUUCU</b> Ie1       | 9.24±0.04          | 51.6            | UUUGCAGGAGAUG<br><b>GUCUUCU</b>         | 7.52±0.01          | 43.0            | 0                                                           | 1.72                                | 78.2 ± 1.9<br>(18.7 ± 2.5)                                | 99.6 ± 0.7<br>(-1.9 ± 2.4)                            | 21.4 ± 2.0  | -                                      | -       | -                        |
| UUUGCAGGAGAUG<br><b>GUCUUCUAC</b> Ie2     | 11.88±0.09         | 58.7            | UUUGCAGGAGAUG<br><b>GUCUUCUAC</b>       | 10.44±0.06         | 52.0            | (0)                                                         | 1.44                                | 14.3 ± 2.1<br>(82.6 ± 2.7)                                | 56.6 ± 2.6<br>(41.1 ± 3.5)                            | 42.3 ± 3.3  | 50%                                    | 5%      | 45%<br>(25/100)          |
| UUUGCAGGAGAUG<br><b>AAACGTCTTCUAC</b> eKM | 11.69±0.15         | 57.3            | UUUGCAGGAGAUG<br><b>AAACGTCTTCUAC</b>   | 17.00±0.48         | 73.2            | 8.76<br>(5.12)                                              | -5.31                               | 96.9 ± 1.7<br>(0.0)                                       | 97.7 ± 2.3<br>(0.0)                                   | 0.8 ± 3.3   | 80%                                    | 37%     | 43%<br>(50)              |
| <i>Transition G/A (G46A, SNCA)</i>        |                    |                 |                                         |                    |                 |                                                             |                                     |                                                           |                                                       |             |                                        |         |                          |
| ACCAAGGAGGGAG<br><b>UUCUCC</b> Ik1        | 11.83±0.10         | 67.9            | ACCAAGAAGGGAG<br><b>UUCUCC</b>          | 7.76±0.02          | 63.4            | 0                                                           | 4.07                                | 15.9 ± 1.2<br>(70.4 ± 4.9)                                | 64.8 ± 3.4<br>(13.0 ± 15.0)                           | 48.9 ± 3.9  | 100%                                   | 35%     | 65%<br>(25/50)           |
| ACCAAGGAGGGAG<br><b>GGUCCUCC</b> Ik2      | 20.98±0.58         | 82.8            | ACCAAGAAGGGAG<br><b>GGUCCUCC</b>        | 13.45±0.17         | 63.5            | (0)                                                         | 7.53                                | 0                                                         | 18.2 ± 4.4<br>(59.6 ± 15.4)                           | 18.2        | 70%                                    | 23%     | 47%<br>(25/75)           |
| ACCAAGGAGGGAG<br><b>UGGTCTTCCUC</b> kKM   | 20.59±0.50         | 78.8            | ACCAAGAAGGGAG<br><b>UGGTCTTCCUC</b>     | 23.95±0.43         | 81.3            | 12.12<br>(2.97)                                             | -3.36                               | 86.3 ± 4.8<br>(0.0)                                       | 77.8 ± 14.6<br>(0.0)                                  | -8.5 ± 15.4 | 28%                                    | 17%     | 10%<br>(50)              |
| <i>Transition G/A (G53A, SNCA)</i>        |                    |                 |                                         |                    |                 |                                                             |                                     |                                                           |                                                       |             |                                        |         |                          |
| GGUGUGGCAACAG<br><b>CACCGUU</b> Ih1       | 10.33±0.07         | 60.4            | GGUGUGCAACAG<br><b>CACCGUU</b>          | 6.22±0.05          | 34.2            | 0                                                           | 4.11                                | 15.9 ± 2.0<br>(81.0 ± 2.9)                                | 99.3 ± 0.8<br>(-0.2 ± 0.9)                            | 83.4 ± 2.1  | 60%                                    | 15%     | 45%<br>(25/100)          |
| GGUGUGGCAACAG<br><b>ACACCGUUGU</b> Ih2    | 16.12±0.13         | 75.1            | GGUGUGCAACAG<br><b>ACACCGUUGU</b>       | 10.58±0.06         | 54.1            | (0)                                                         | 5.54                                | 5.9 ± 2.3<br>(91.0 ± 3.1)                                 | 50.8 ± 3.4<br>(48.3 ± 3.5)                            | 44.9 ± 4.1  | 45%                                    | 11%     | 34%<br>(25/100)          |
| GGUGUGGCAACAG<br><b>CCACACTGTTGUC</b> hKM | 16.29±0.09         | 72.9            | GGUGUGCAACAG<br><b>CCACACTGTTGUC</b>    | 18.99±0.34         | 73.8            | 8.61<br>(2.87)                                              | -2.90                               | 96.9 ± 2.1<br>(0.0)                                       | 99.1 ± 0.3<br>(0.0)                                   | 2.2 ± 2.3   | 46%                                    | 30%     | 16%<br>(100)             |
| <i>Transition C/U (C4U, SOD1)</i>         |                    |                 |                                         |                    |                 |                                                             |                                     |                                                           |                                                       |             |                                        |         |                          |
| CGAAGGCCGUGUG<br><b>UCCGGCA</b> Ia1       | 12.41±0.12         | 71.8            | CGAAGGUCGUGUG<br><b>UCCGGCA</b>         | 10.12±0.19         | 56.1            | 0                                                           | 2.29                                | 50.5 ± 3.1<br>(46.0 ± 4.5)                                | 99.6 ± 1.3<br>(-5.7 ± 7.9)                            | 49.1 ± 3.4  | 50%                                    | 32%     | 18%<br>(75/50)           |
| CGAAGGCCGUGUG<br><b>CUCCGGCAC</b> Ia2     | 17.04±0.65         | 80.1            | CGAAGGUCGUGUG<br><b>CUCCGGCAC</b>       | 16.56±0.09         | 69.5            | (0)                                                         | 0.48                                | 21.3 ± 1.6<br>(75.0 ± 3.7)                                | 81.9 ± 2.0<br>(12.0 ± 8.0)                            | 60.6 ± 2.6  | 46%                                    | 19%     | 27%<br>(25/50)           |
| CGAAGGCCGUGUG<br><b>GCUTTCAGCAC</b> aKM   | 17.62±0.34         | 71.2            | CGAAGGUCGUGUG<br><b>GCUTTCAGCAC</b>     | 20.24±0.15         | 78.7            | 7.83<br>(3.20)                                              | -2.62                               | 96.3 ± 3.3<br>(0.0)                                       | 93.9 ± 7.4<br>(0.0)                                   | -2.4 ± 8.1  | 110%                                   | 55%     | 55%<br>(50)              |
| <i>Transversion G/C (G291C, SCA3)</i>     |                    |                 |                                         |                    |                 |                                                             |                                     |                                                           |                                                       |             |                                        |         |                          |
| GCAGGGGACCUG<br><b>GUCCCC</b> If1         | 14.41 ± 1.13       | 68.8            | GCAGCGGACCUG<br><b>GUCCCC</b>           | 6.47 ± 0.05        | 36.5            | 0                                                           | 7.94                                | 11.7 ± 2.3<br>(58.4 ± 3.4)                                | 31.1 ± 1.9<br>(2.6 ± 2.1)                             | 19.4 ± 3.0  | -                                      | -       | -                        |
| GCAGGGGACCUG<br><b>CGUCCCCUG</b> If2      | 20.91 ± 0.87       | 82.7            | GCAGCGGACCUG<br><b>CGUCCCCUG</b>        | 11.35 ± 0.07       | 59.2            | (0)                                                         | 9.56                                | 0                                                         | 2.7 ± 1.5<br>(31.0 ± 1.9)                             | 2.7         | -                                      | -       | -                        |
| GCAGGGGACCUG<br><b>CGUCGCCTGGAU</b> fKM   | 17.94 ± 0.75       | 66.5            | GCAGCGGACCUG<br><b>CGUCGCCTGGAU</b>     | 27.7 ± 2.9         | 80.3            | 13.29<br>(6.79)                                             | -9.76                               | 70.1 ± 2.5<br>(0.0)                                       | 33.7 ± 1.1<br>(0.0)                                   | -36.4 ± 2.7 | 79%                                    | 13%     | 66%<br>(50)              |

a – melting temperature of the duplex at concentration 10<sup>-4</sup>M, b – differences in thermodynamic stability of the WT RNA/short inhibitor (Ix1) and Mut RNA/gapmer (xKM) duplexes, c – differences in thermodynamic stability of WT RNA/longer inhibitor (Ix2) and Mut RNA/gapmer (xKM) duplexes, d – errors calculated with standard deviation, e – for cleavage of WT or Mut RNA shorter inhibitors and gapmer were used, f – differences in hydrolysis of WT or Mut RNA in presence of gapmer only and the appropriate RNA in the presence of both the gapmer and shorter inhibitor, g – for cleavage of WT or Mut RNA the longer inhibitor and gapmer were used, h – differences in hydrolysis of WT or Mut RNA in the presence of gapmer only and the appropriate RNA in the presence of both the gapmer and longer inhibitor, i – for cleavage of WT or Mut RNA only the gapmer was used, j – the abbreviation 25/50 refers to transfection of the *HeLa* cells with 25 nM and 50 nM concentrations of inhibitor and gapmer, respectively, k – the abbreviation 50 refers to transfection of the *HeLa* cells with 50 nM of gapmer only, empty cells (-) – statistically insignificant results were obtained. Underlined letters indicated the position of the SNP, red letters corresponded to 2'-O-methylated RNA, blue letters indicated the position of the LNA nucleotides, the bolded region corresponded to the DNA fragment within the gapmer, and the remaining letters correspond to the RNA.
