# Supplementary material for: A Tandem Oligonucleotide Approach for SNP-Selective RNA Degradation Using Modified Antisense Oligonucleotides
Source: PubMed Central journal article supplement (PMC4704561; doi:10.1371/journal.pone.0142139), 2015-11-06
Supplement: pone.0142139.s014.pdf [file pone.0142139.s014.pdf]

|      |                                  | <b>Kd (nM)</b> |              |             |
|------|----------------------------------|----------------|--------------|-------------|
| Gene | SNP type<br>wt/mutant<br>(codon) | Wild type      | Mutant       | EMSA result |
| APP  | C/G (692)                        | 180.2 ± 6.4    | 60.9 ± 5.1   |             |
|      | A/G (693)                        | 233.1 ± 2.5    | 442.0 ± 49.2 |             |
|      | G/A (717)                        | 342.1 ± 49.2   | 419.3 ± 49.5 |             |
| SNCA | G/A (46)                         | 42.9 ± 1.4     | 60.9 ± 3.6   |             |
|      | G/A (53)                         | 130.8 ± 2.0    | 197.3 ± 50.0 |             |
| SOD1 | C/U (4)                          | 89.0 ± 1.3     | n/a          |             |
| SCA3 | G/C (291)                        | n/a            | n/a          | -           |
