# Supplementary material for: A Tandem Oligonucleotide Approach for SNP-Selective RNA Degradation Using Modified Antisense Oligonucleotides
Source: PubMed Central journal article supplement (PMC4704561; doi:10.1371/journal.pone.0142139), 2015-11-06
Supplement: pone.0142139.s015.pdf [file pone.0142139.s015.pdf]

| Variant | Name | Length | 5'-3' sequence |
|---------|------|--------|----------------|
| WT      | 291G | 13     | GCAGGGGGACCUA  |
| Mut     | 291C | 13     | GCAGCGGGACCUA  |
| WT      | 692C | 13     | UUUGCAGAAGAUG  |
| Mut     | 692G | 13     | UUUGGAGAAGAUG  |
| WT      | 693A | 13     | UUUGCAGAAGAUG  |
| Mut     | 693G | 13     | UUUGCAGGAGAUG  |
| WT      | 717G | 13     | GUGAUCGUCAUCA  |
| Mut     | 717A | 13     | GUGAUCAUCAUCA  |
| WT      | 4C   | 13     | CGAAGGCCGUGUG  |
| Mut     | 4U   | 13     | CGAAGGUCGUGUG  |
| WT      | 53G  | 13     | GGUGUGGCAACAG  |
| Mut     | 53A  | 13     | GGUGUGACAACAG  |
| WT      | 46G  | 13     | ACCAAGGAGGGAG  |
| Mut     | 46A  | 13     | ACCAAGAAGGGAG  |
